# Supplementary material for: Effect of joining temperature on the interconnection zone and electrical resistance of Ag/n-Mg2Si and Ag/n-Mg2Sn contacts
Source: Royal Society of Chemistry journal article supplement (doi:10.1039/d2ma00038e), 2022-01-01
Supplement: d2ma00038e1.pdf [file d2ma00038e1.pdf]

### Supplementary Information

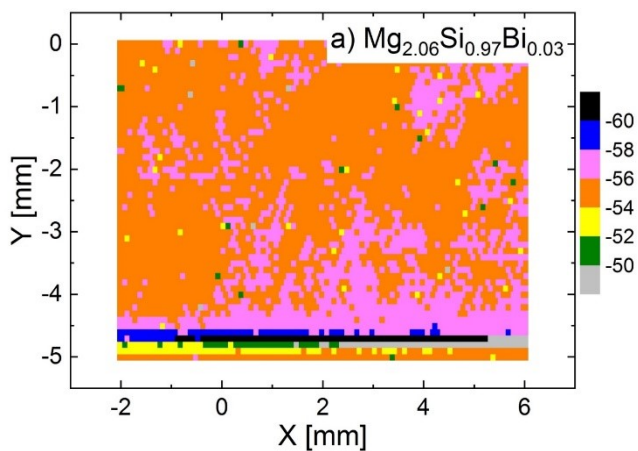

S1: Surface Seebeck scan of  $n\text{-Mg}_2\text{Si}$

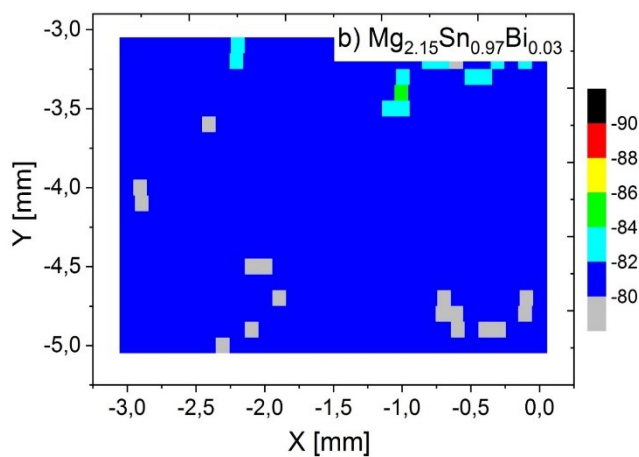

S2: Surface Seebeck scan of  $n\text{-Mg}_2\text{Sn}$

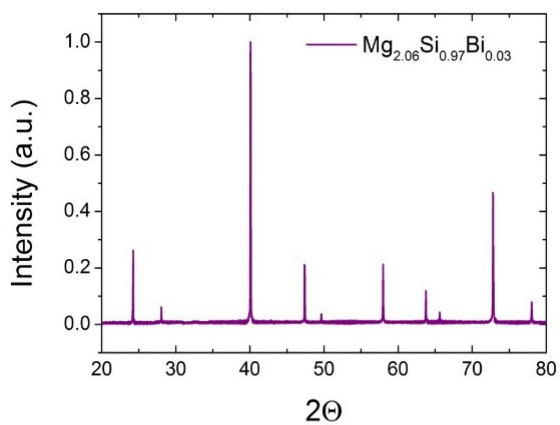

S3: X-ray diffraction on a sintered pellet of  $n\text{-Mg}_2\text{Si}$

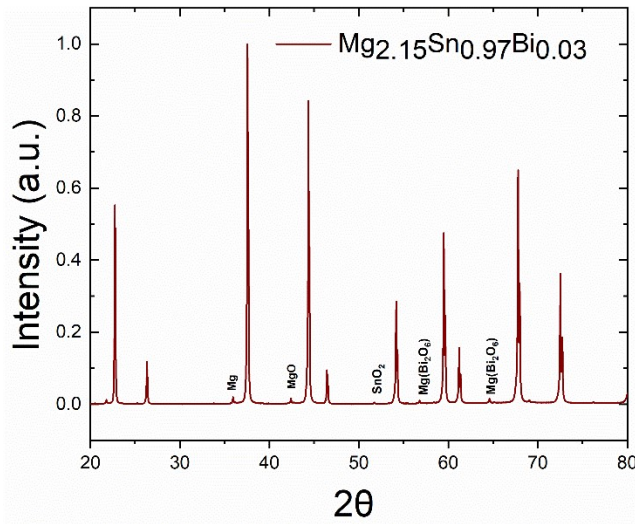

S4: X-ray diffraction on a sintered pellet of  $n\text{-Mg}_2\text{Sn}$

$\text{Mg}_{2.06}\text{Si}_{0.97}\text{Bi}_{0.03}/\text{Ag}$  at 500 °C

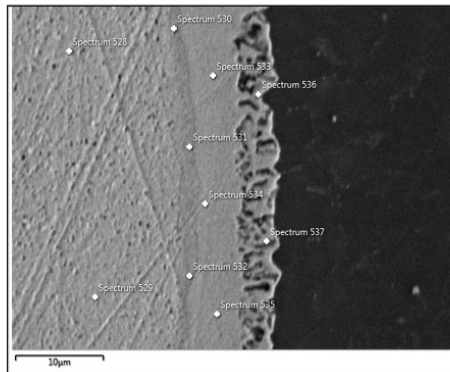

| Spectrum Label (At%) | 528    | 529   | 530                        | 531   | 532   | 533     | 534   | 535               | 536   | 537   |
|----------------------|--------|-------|----------------------------|-------|-------|---------|-------|-------------------|-------|-------|
| Mg                   | 0.00   | 0.00  | 21.84                      | 23.70 | 22.97 | 37.38   | 35.71 | 35.97             | 30.49 | 25.90 |
| Si                   | 0.00   | 0.03  | 1.08                       | 0.96  | 1.02  | 1.32    | 0.57  | 1.33              | 22.12 | 31.98 |
| Ag                   | 100.00 | 99.97 | 77.08                      | 75.33 | 76.01 | 61.30   | 63.72 | 62.70             | 47.39 | 42.12 |
| Suggested phase      | Ag     |       | FCC (Ag) terminal solution |       |       | β- MgAg |       | AgMg + Si islands |       |       |

S5: A spectrum-wise point analysis of  $n\text{-Mg}_2\text{Si}/\text{Ag}$  at 500 °C. The columns 530-532, and the columns 533-535 are the corresponding results for the approximated numbers of L1 and L2 from Table 2, respectively. However, L3 in Table 2 is tailored as an average of spectrum 536 and 537. All the compositions are carefully normalized by avoiding C signals that was a result of preparation of samples.

$\text{Mg}_{2.06}\text{Sn}_{0.97}\text{Bi}_{0.03}/\text{Ag}$  at 450 °C

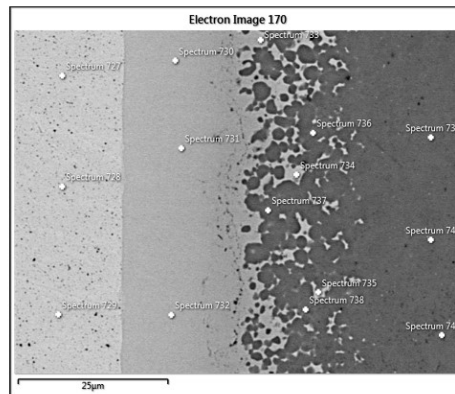

| Spectrum Label (At%) | 727   | 728   | 729   | 730                                                    | 731   | 732   | 733   | 735                | 736                              | 737   | 738   | 739   | 740   | 741   |
|----------------------|-------|-------|-------|--------------------------------------------------------|-------|-------|-------|--------------------|----------------------------------|-------|-------|-------|-------|-------|
| Mg                   | 0.49  | 0.22  | 0.60  | 30.66                                                  | 31.50 | 31.68 | 40.05 | 42.94              | 65.81                            | 66.02 | 65.61 | 65.68 | 65.56 | 65.44 |
| Ag                   | 99.51 | 99.78 | 99.40 | 61.67                                                  | 61.06 | 60.74 | 46.29 | 35.14              | 1.23                             | 0.92  | 1.24  | 0.87  | 0.99  | 0.90  |
| Sn                   | 0.00  | 0.00  | 0.00  | 7.67                                                   | 7.44  | 7.58  | 13.66 | 21.92              | 32.96                            | 33.06 | 33.15 | 33.45 | 33.45 | 33.66 |
| Suggested phase      | Ag    |       |       | Wide composition MgAg (50 < Ag < 65 at%) dissolving Sn |       |       |       | MgAg dissolving Sn | Mg <sub>2</sub> Sn dissolving Ag |       |       |       |       |       |

*S6: A spectrum-wise point analysis of n-Mg<sub>2</sub>Sn/Ag at 450 °C. All the compositions are carefully normalized by avoiding C signals that was a result of preparation of samples.*
